# Supplementary material for: Multi-country real-life experience of anti-vascular endothelial growth factor therapy for wet age-related macular degeneration
Source: PubMed Central journal article supplement — Br J Ophthalmol. 2014 Sep 5;99(2):220–6. doi: 10.1136/bjophthalmol-2014-305327 (PMC4316940; doi:10.1136/bjophthalmol-2014-305327), 2014-09-05

**Supplemental Figure 1.** Patient flow diagram.

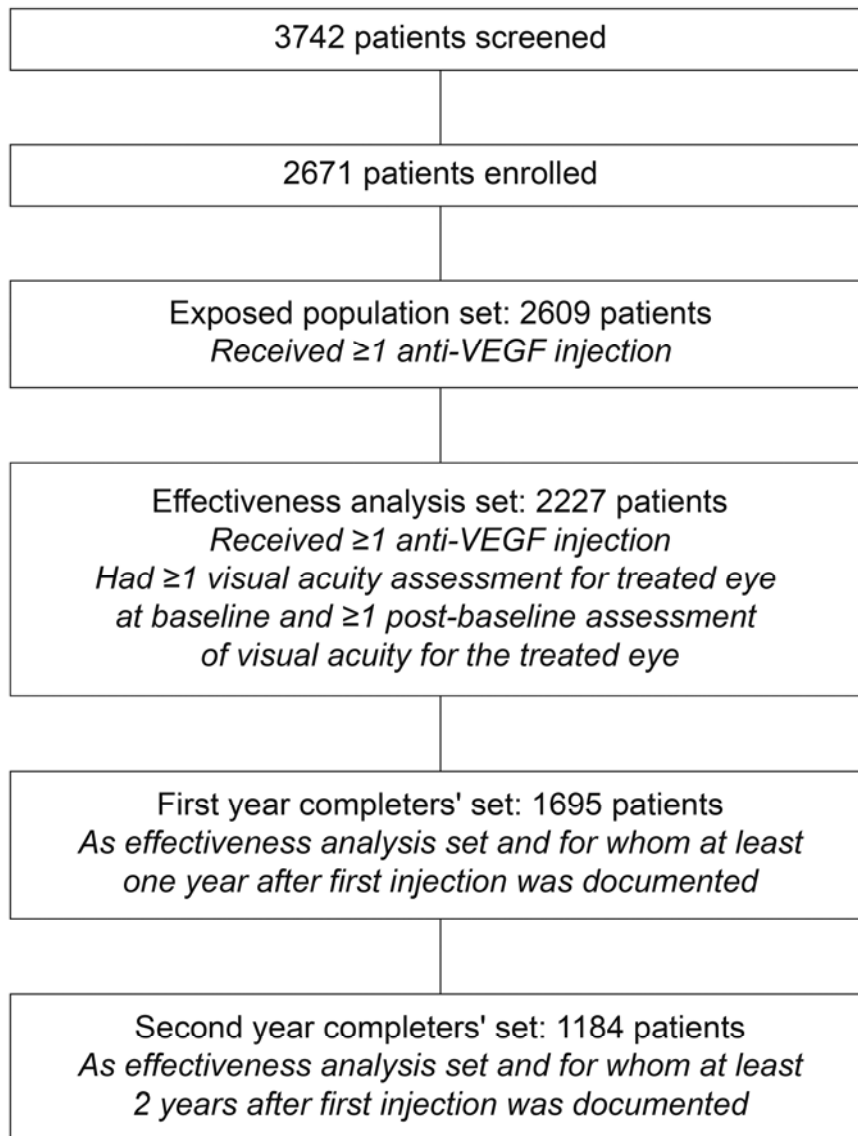

**Supplemental Figure 2.** Baseline visual acuity score by country. The diamond represents the median; the upper and lower limits of the box represent the 75<sup>th</sup> and 25<sup>th</sup> percentiles, respectively, and the whiskers represent the 95<sup>th</sup> and 5<sup>th</sup> percentiles.

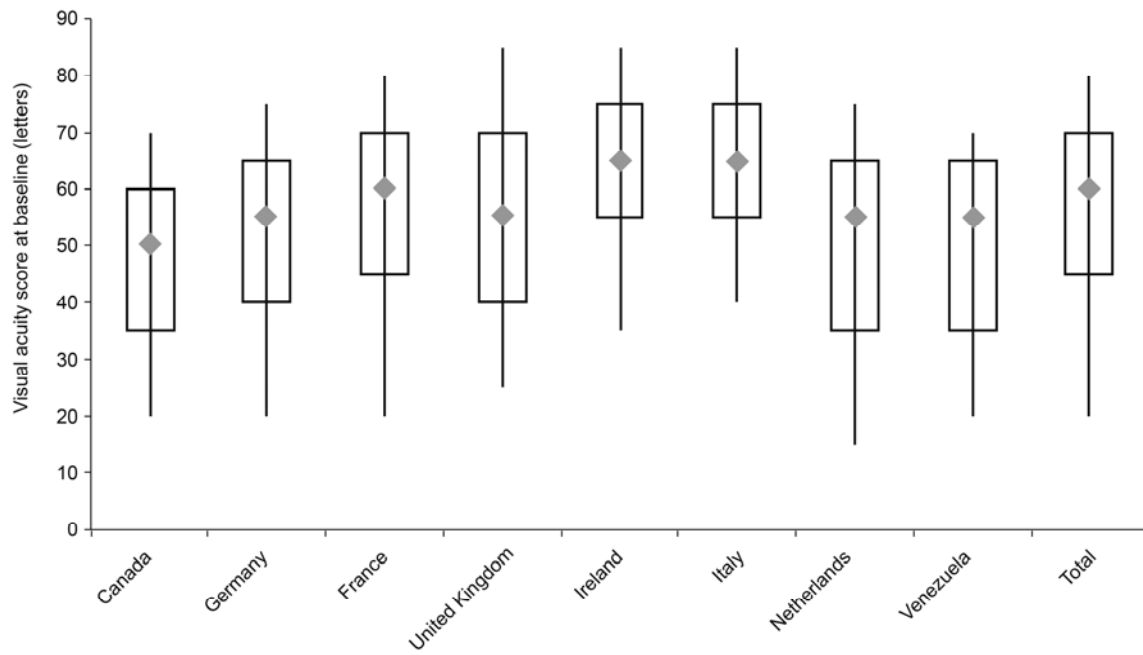

**Supplementary Figure 3.** LOCF analysis compared with observed values for the effectiveness analysis set (A), the first year completers' set (B) and the second year completers' set (C). LOCF, last observation carried forward.

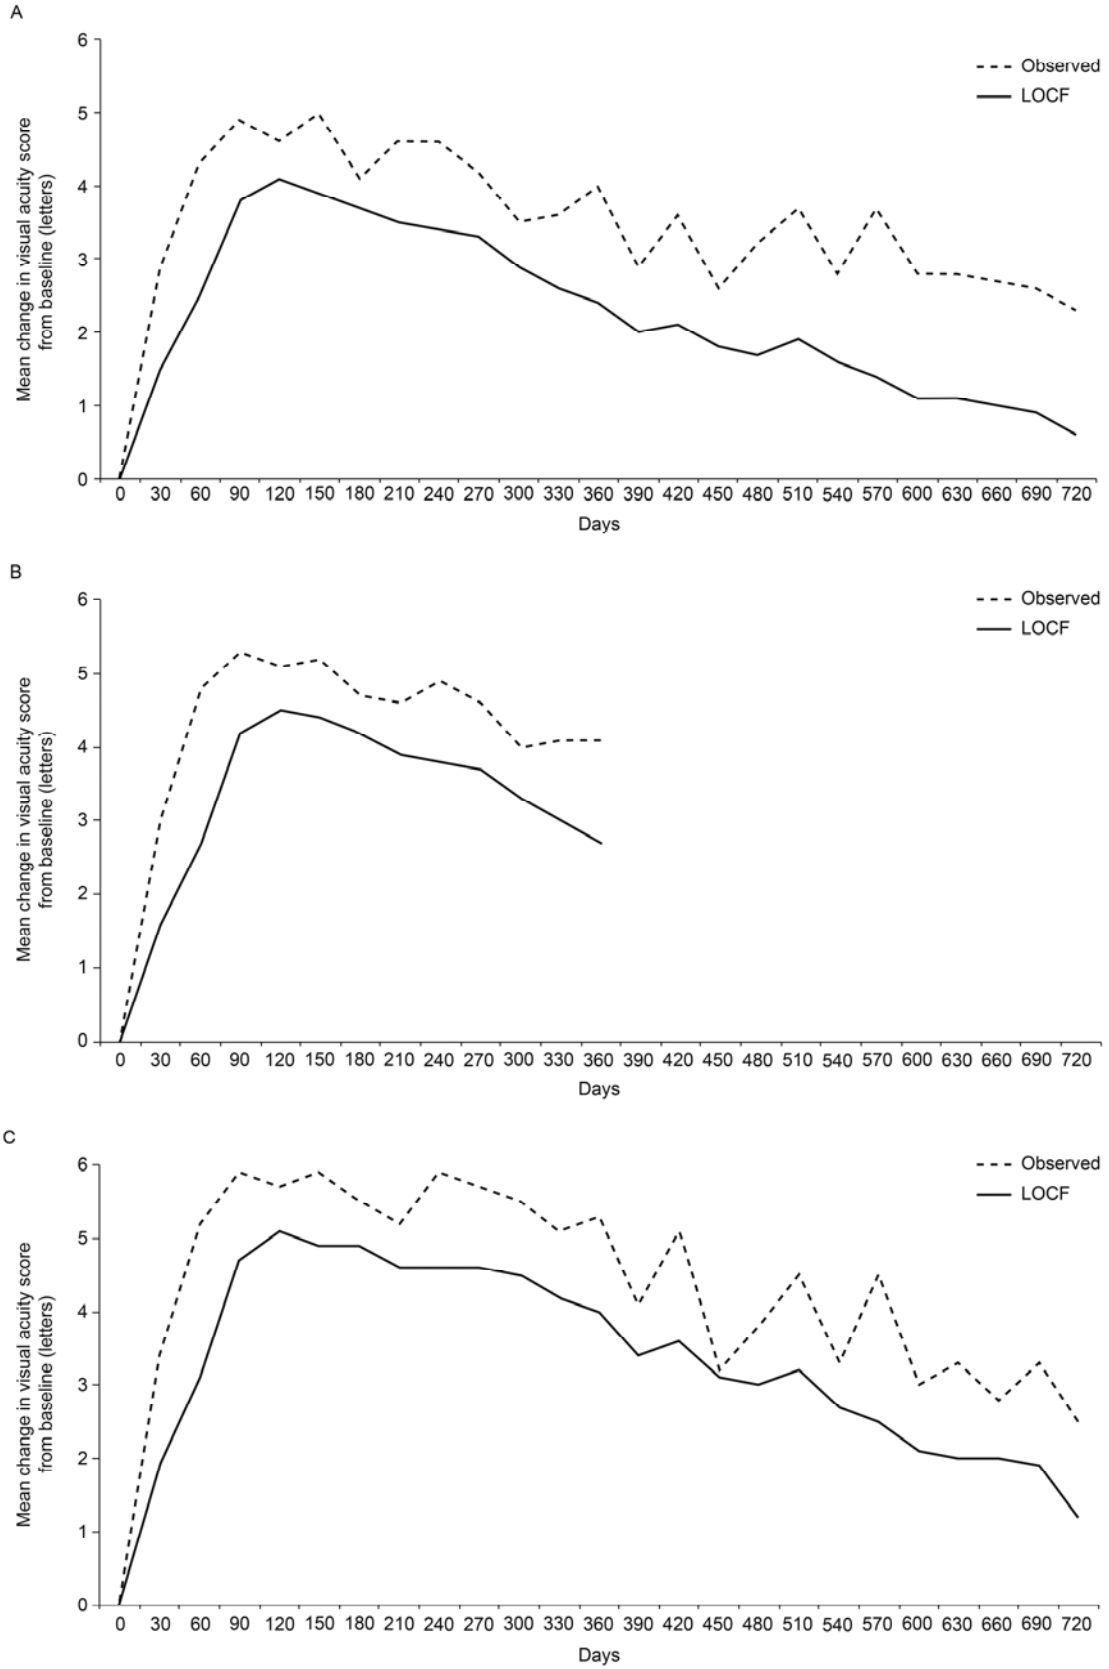

Supplement: bjophthalmol-2014-305327-s1.pdf [file bjophthalmol-2014-305327-s1.pdf]
